# Supplementary material for: Mass Spectrometry Imaging and Identification of Peptides Associated with Cephalic Ganglia Regeneration in Schmidtea mediterranea
Source: PubMed Central journal article supplement (PMC4825013; doi:10.1074/jbc.m115.709196), 2016-02-16
Supplement: 10.1074_M115.709196_jbc.M115.709196-1.pdf [file 10.1074_M115.709196_jbc.M115.709196-1.pdf]

## **Mass Spectrometry Imaging and Identification of Peptides Associated with Cephalic Ganglia Regeneration in *Schmidtea mediterranea***

Ta-Hsuan Ong<sup>1</sup>, Elena V. Romanova<sup>1</sup>, Ning Yang<sup>1</sup>, Tyler A. Zimmerman<sup>1^</sup>, James J. Collins<sup>2,%</sup>, Rachel Roberts-Galbraith<sup>2</sup>, Ji Eun Lee<sup>1,#</sup>, Neil Kelleher<sup>3</sup>, Phillip A. Newmark<sup>2</sup>, Jonathan V. Sweedler<sup>1,\*</sup>

<sup>1</sup>Department of Chemistry, and the Beckman Institute, University of Illinois at Urbana-Champaign, Urbana, Illinois 61801, United States

<sup>2</sup>Department of Cell and Developmental Biology, University of Illinois at Urbana-Champaign, Urbana, Illinois 61801, United States

<sup>3</sup>Department of Chemistry, Department of Molecular Biosciences, Proteomics Center of Excellence, Northwestern University, Evanston, IL, USA

Current addresses:

<sup>^</sup>Mass Spectrometry Data Center Group, National Institute of Standards and Technology, Gaithersburg, MD 20899, United States

<sup>%</sup> Department of Pharmacology, University of Texas Southwestern Medical Center, Dallas, TX 75390, USA

<sup>#</sup>Center for Theragnosis, Biomedical Research Institute, Korea Institute of Science and Technology, Seoul 136-791, Republic of Korea

### **SUPPLEMENTAL DATA**

**Table S1. Identified peptides from HPLC–ESI-(Q)TOF MS/MS and HPLC-ESI-FT-ICR MS/MS conducted on regenerating *S. mediterranea*.** Peptides that were identified using PEAKS Studio are shown with their associated score percent and score (-10lgP). Peptides identified using ProSight PC are shown with their associated E-value.

| Accession           | Protein/Prohormone                       | Sequence                                                    | PEAKS     |        | ProSight |
|---------------------|------------------------------------------|-------------------------------------------------------------|-----------|--------|----------|
|                     |                                          |                                                             | Score (%) | -10lgP | E-Value  |
| V9XRL6 V9XRL6_SCHMD | 1.C5.1                                   | VQNYELE-Mo-PEIIA                                            | 57.9      | 24.2   | -        |
| E3T7U2 E3T7U2_SCHMD | 1020HH-1 protein                         | YLSDGTSLENFDDLESNSD<br>Y-Mo                                 | 96.2      | 33.96  | -        |
| E3T7U2 E3T7U2_SCHMD | 1020HH-1 protein                         | YLSDGTSLENFDDLESNSD<br>Y-Mo,a                               | 89.2      | 30.58  | -        |
| E3CTK0 E3CTK0_SCHMD | 1020HH-2                                 | VPRSAENLR TYDSLLEELN<br>DYDPIY                              | 99.8      | 49.25  | -        |
| H2DL21 H2DL21_SCHMD | Caspase 2                                | IIFSCCRGETAALASMLVM<br>ESISHSDSL SINDEIQKDRY<br>DEFAWQVGNYP | -         | -      | 8.56E-07 |
| I1ZIF8 I1ZIF8_SCHMD | Clathrin heavy chain-1                   | AGPMGIPN-Mo-YGAGSVG<br>PGFA                                 | 96        | 32.11  | -        |
| I1ZIF8 I1ZIF8_SCHMD | Clathrin heavy chain-1                   | LTAGP-Mo-GIPN-Mo-YGA<br>GSVGPFA                             | 96        | 32.43  | -        |
| R4PLE1 R4PLE1_SCHMD | Dmd-3 (Fragment)                         | DSISLNNQLTS                                                 | -         | -      | 1.36E-06 |
| E3CTK8 E3CTK8_SCHMD | EYE53-1                                  | LSIPTYW                                                     | 93.1      | 30.51  | -        |
| E3CTK8 E3CTK8_SCHMD | EYE53-1                                  | LSVPTYFDDWES                                                | 99.9      | 75.9   | -        |
| E3CTK8 E3CTK8_SCHMD | EYE53-1                                  | LSIPTYWDDIDTS                                               | 99.9      | 79.81  | -        |
| E3CTJ9 E3CTJ9_SCHMD | EYE53-2                                  | AVVPDAWDDWEI                                                | 99.9      | 72.45  | -        |
| J7FNB1 J7FNB1_SCHMD | FoxQ2 (Fragment)                         | PYFWPHNIEDEDK                                               | -         | -      | 1.03E-09 |
| T1DF42 T1DF42_SCHMD | Fzd-5/8-3                                | NLLNEVSYQLT                                                 | -         | -      | 2.18E-05 |
| I1ZI85 I1ZI85_SCHMD | GLI pathogenesis related-1<br>(Fragment) | SASKAQITADKCIFAHDT                                          | -         | -      | 1.30E-5  |

|                             |                                     |                                                           |      |       |          |
|-----------------------------|-------------------------------------|-----------------------------------------------------------|------|-------|----------|
| Q1WC09 Q1WC09_SCHMD         | Glycogen synthase kinase 3          | LLEYTPSTRVSPIESCTHSF<br>FDELRQUESTKLPNDKPLPP<br>LFNFASNEI | -    | -     | 5.41E-05 |
| S5VL05 S5VL05_SCHMD         | Histone H1 (Fragment)               | KAKATPKKVAPKKTPKKA<br>PVKAKK                              | 99.4 | 55.56 | -        |
| S5W362 S5W362_SCHMD         | Histone H2A (Fragment)              | AILLPKKTPKESS                                             | 70.7 | 27.37 | -        |
| S5W362 S5W362_SCHMD         | Histone H2A (Fragment)              | GVTIAQGGVLPNIQAILLPK<br>KTPKESS                           | 96.6 | 36.85 | -        |
| S5W362 S5W362_SCHMD         | Histone H2A (Fragment)              | IAQGGVLPNIQAILLPKKT<br>KESS                               | 99.9 | 59.1  | -        |
| S5VQT0 S5VQT0_SCHMD         | Histone H3 (Fragment)               | ARTKQTAR-Kac-STGG-Kac<br>-APRKQ                           | 56   | 21.89 | -        |
| V5SM21 V5SM21_SCHMD         | Insulin gene enhancer protein isl-1 | ILDDSSMNSDIDDI                                            | -    | -     | 2.51E-06 |
| A0A060Q785 A0A060Q785_SCHMD | Metalloendopeptidase                | acS-GQ-C*-Ga                                              | 76   | 30.31 | -        |
| A0A060Q785 A0A060Q785_SCHMD | Metalloendopeptidase                | SVDSMKMGD-Mo-LL                                           | 99.4 | 41.77 | -        |
| I1ZIC3 I1ZIC3_SCHMD         | Metalloendopeptidase                | ATENLHVGD-Mo-LL                                           | 98.4 | 34.59 | -        |
| K0JBS3 K0JBS3_SCHMD         | Mmp1 protein                        | EFYDYDKSTGSLK                                             | 99.9 | 73.05 | -        |
| K0JBS3 K0JBS3_SCHMD         | Mmp1 protein                        | FKSSEEKDAEKYLT                                            | 97.2 | 37.56 | -        |
| K0JBS3 K0JBS3_SCHMD         | Mmp1 protein                        | GAKFPPS                                                   | 43   | 22.39 | -        |
| K0JBS3 K0JBS3_SCHMD         | Mmp1 protein                        | DSLKDLQKMAGIEADGKLS                                       | 99.2 | 47.29 | -        |
| K0JBS3 K0JBS3_SCHMD         | Mmp1 protein                        | FKSSEEKDAEKYLTEFYDY<br>DKSTGSLKDSLK                       | 99.9 | 83.53 | -        |
| K0JBI8 K0JBI8_SCHMD         | Mmp2 protein                        | FESSDEKSVEKFLS                                            | 97.7 | 47.65 | -        |
| K0JBI8 K0JBI8_SCHMD         | Mmp2 protein                        | DYNEKSDKLSDAVKNIQK-<br>Mo-AGLPTDGKITKELLA                 | 99.1 | 43.7  | -        |
| Q49BF9 Q49BF9_SCHMD         | Netrin 1                            | EITSTCGQNKQWICV                                           | -    | -     | 3.16E-07 |
| E3T7U4 E3T7U4_SCHMD         | Neuropeptide 12                     | RYFQPQQDFPKSNIFQLPES<br>EFENDDVIQ                         | 75.2 | 27.77 | -        |
| E3T7U4 E3T7U4_SCHMD         | Neuropeptide 12                     | pQ-PQQDFPKSNIFQLPESEF<br>ENDDVIQ                          | 95.1 | 35.07 | -        |

|                     |                                                   |                                          |      |       |   |
|---------------------|---------------------------------------------------|------------------------------------------|------|-------|---|
| E3T7V1 E3T7V1_SCHMD | Neuropeptide 8                                    | DPRFSDQVWHSYG-Ya                         | 11.4 | 26.72 | - |
| E3CTJ4 E3CTJ4_SCHMD | Neuropeptide Y prohormone-2                       | SANPLKW-Mo-TL                            | 98.5 | 36.67 | - |
| E3CTI4 E3CTI4_SCHMD | Neuropeptide Y prohormone-3                       | NKDELDILF                                | 99.6 | 44.17 | - |
| E3CTL4 E3CTL4_SCHMD | Neuropeptide Y prohormone-4                       | QTNWYDMKNYEGNENYD<br>S                   | 59.3 | 26.44 | - |
| E3CTL5 E3CTL5_SCHMD | Neuropeptide Y prohormone-9                       | LTKQKYSLFSGPEDLRNYL<br>RQLNEYIALSSRPR-Ya | 99.6 | 45.19 | - |
| E3CTK2 E3CTK2_SCHMD | Neuropeptide-18                                   | RNMDLDEYDSSLPKD                          | 18.7 | 28.33 | - |
| E3CTK2 E3CTK2_SCHMD | Neuropeptide-18                                   | GAEFFIRRV-Va                             | 9.1  | 25.04 | - |
| E3CTK2 E3CTK2_SCHMD | Neuropeptide-18<br>Secreted peptide prohormone-10 | GAEFFI/LR                                | 40.6 | 29.52 | - |
| E3CTL0 E3CTL0_SCHMD | Neuropeptide-2                                    | pQ-LLNSKQSIFQDEY                         | 99.9 | 54.03 | - |
| E3CTL0 E3CTL0_SCHMD | Neuropeptide-2                                    | NSKQSIFQDEY                              | 32.5 | 23.55 | - |
| E3CTL0 E3CTL0_SCHMD | Neuropeptide-2                                    | pQ-LLNSKQSIFQDEY                         | 22.7 | 22.67 | - |
| E3CTJ0 E3CTJ0_SCHMD | Neuropeptide-5                                    | LNNPFEKSLILN                             | 73.7 | 22.13 | - |
| E3CTJ0 E3CTJ0_SCHMD | Neuropeptide-5                                    | LNNPFEKSLILNNESEFED                      | 99.9 | 62.79 | - |
| E3CTL6 E3CTL6_SCHMD | Pedal peptide prohormone like-1                   | FYNDPLGVALLK                             | 99.2 | 45.95 | - |
| E3CTL6 E3CTL6_SCHMD | Pedal peptide prohormone like-1                   | FYNDPLGVALLKSRFDKDS<br>IN                | 98.5 | 35.42 | - |
| E3CTL6 E3CTL6_SCHMD | Pedal peptide prohormone like-1                   | GAYYDPIGGGLL                             | 99.9 | 56.92 | - |
| E3CTL6 E3CTL6_SCHMD | Pedal peptide prohormone like-1                   | RSFYDPIGGGLL                             | 99.9 | 48.67 | - |
| E3CTL6 E3CTL6_SCHMD | Pedal peptide prohormone like-1                   | SSYYDPIGGGLL                             | 99.7 | 44.2  | - |
| E3CTL6 E3CTL6_SCHMD | Pedal peptide prohormone like-1                   | VALLKSRFDKDSIN                           | 80.7 | 38.34 | - |
| E3CTL6 E3CTL6_SCHMD | Pedal peptide prohormone like-1                   | YSYYDSIGSGLL                             | 95.9 | 32.35 | - |
| E3CTL6 E3CTL6_SCHMD | Pedal peptide prohormone like-1                   | DSNYDPIGGGLL                             | 99.9 | 57.11 | - |
| E3CTL6 E3CTL6_SCHMD | Pedal peptide prohormone like-1                   | SSYYDPIGGGLL                             | 99.9 | 58.99 | - |
| E3CTL6 E3CTL6_SCHMD | Pedal peptide prohormone like-1                   | YSYYDSIGSGLL                             | 99.9 | 63.63 | - |
| E3CTL6 E3CTL6_SCHMD | Pedal peptide prohormone like-1                   | GAYYDPIGGGLL                             | 99.9 | 72.72 | - |
| E3CTL6 E3CTL6_SCHMD | Pedal peptide prohormone like-1                   | RSFYDPIGGGLL                             | 99.9 | 75    | - |
| E3CTJ3 E3CTJ3_SCHMD | Pedal peptide prohormone like-2                   | SYMDKIGSDLL                              | 99.4 | 46.35 | - |
| E3CTJ3 E3CTJ3_SCHMD | Pedal peptide prohormone like-2                   | FRYFDKIGSDLL                             | 95.6 | 35.22 | - |

|                     |                                 |                                                               |      |       |          |
|---------------------|---------------------------------|---------------------------------------------------------------|------|-------|----------|
| E3CTJ3 E3CTJ3_SCHMD | Pedal peptide prohormone like-2 | SYFDKIGNDLL                                                   | 99.9 | 73.17 | -        |
| C3U5B2 C3U5B2_SCHMD | Protein Wnt                     | SGTQEQAVVHAFSSASLLF<br>EIARRCAQNKMAHCSCGT<br>SNPTANQEITQEKLLF | -    | -     | 2.24E-06 |
| E3CTI2 E3CTI2_SCHMD | Pyrokinin prohormone like-1     | KNFIYIPDDSFINE-Mo-DRA<br>ID                                   | 95.9 | 32.18 | -        |
| E3T7T8 E3T7T8_SCHMD | Secreted peptide prohormone 1   | ADIDLDDSRDL                                                   | 28.7 | 22.17 | -        |
| E3T7T8 E3T7T8_SCHMD | Secreted peptide prohormone 1   | EDLGSLNADIDLDDSRDL                                            | 100  | 138.6 | -        |
| E3CTJ7 E3CTJ7_SCHMD | Secreted peptide prohormone-3   | SVMDDLKDETYLS                                                 | 99.7 | 51.8  | -        |
| E3T7U1 E3T7U1_SCHMD | Secreted peptide prohormone 4   | DSYHRYPSSI                                                    | 96.9 | 36.49 | -        |
| E3T7U1 E3T7U1_SCHMD | Secreted peptide prohormone 4   | SLNDDSELEDSYHRYPSSI                                           | 34.9 | 24.45 | -        |
| E3T7U1 E3T7U1_SCHMD | Secreted peptide prohormone 4   | NMNDEFQFRDL                                                   | 99.4 | 47.86 | -        |
| E3T7U1 E3T7U1_SCHMD | Secreted peptide prohormone 4   | DYSSLNDDSELEDSYHRYP<br>SSI                                    | 88   | 34.72 | -        |
| E3T7U1 E3T7U1_SCHMD | Secreted peptide prohormone 4   | GLRLMR-La                                                     | 34.1 | 20.05 | -        |
| E3T7V0 E3T7V0_SCHMD | Secreted peptide prohormone 5   | NDLFRLLD                                                      | 99.8 | 49.87 | -        |
| E3T7T9 E3T7T9_SCHMD | Secreted peptide prohormone 6   | LIDPMTFGYGFSNL                                                | 99.6 | 43.25 | -        |
| E3T7T9 E3T7T9_SCHMD | Secreted peptide prohormone 6   | IPGIGFNRFIAIY                                                 | 99.9 | 74.27 | -        |
| E3T7T9 E3T7T9_SCHMD | Secreted peptide prohormone 6   | LIDPMTFGYGFSNL                                                | 99.9 | 77.34 | -        |
| E3T7U0 E3T7U0_SCHMD | Secreted peptide prohormone 7   | RNLHLY                                                        | 43.2 | 22.72 | -        |
| E3T7U0 E3T7U0_SCHMD | Secreted peptide prohormone 7   | TVGFGFNRLHLY                                                  | 99.9 | 56.34 | -        |
| E3T7U3 E3T7U3_SCHMD | Secreted peptide prohormone 8   | DP-Mo-TFGSGFANL                                               | 98.8 | 39.13 | -        |
| E3T7U3 E3T7U3_SCHMD | Secreted peptide prohormone 8   | GFGFNRMMLLY                                                   | 96.1 | 32.95 | -        |
| E3T7U3 E3T7U3_SCHMD | Secreted peptide prohormone 8   | LIDP-Mo-TFG                                                   | 96   | 32.49 | -        |
| E3T7U3 E3T7U3_SCHMD | Secreted peptide prohormone 8   | LIDPMTFGSGFANL                                                | 98.9 | 38.29 | -        |
| E3T7U3 E3T7U3_SCHMD | Secreted peptide prohormone 8   | LIDPMTFGSGFAN-La                                              | 10   | 22.78 | -        |
| E3T7U3 E3T7U3_SCHMD | Secreted peptide prohormone 8   | T-Mo-GFGFNRN-Mo-LLY                                           | 99.9 | 51.8  | -        |
| E3T7U3 E3T7U3_SCHMD | Secreted peptide prohormone 8   | TMGFGFNRMMLLY                                                 | 99.9 | 54.29 | -        |
| E3T7U3 E3T7U3_SCHMD | Secreted peptide prohormone 8   | LIDPMTFGSGFANL                                                | 99.9 | 86.6  | -        |
| E3CTK1 E3CTK1_SCHMD | Secreted peptide prohormone-9   | LIDPLTFG                                                      | 98.4 | 35.68 | -        |
| E3CTK1 E3CTK1_SCHMD | Secreted peptide prohormone-9   | LIDPLTFGSGFSNL                                                | 99.9 | 46.9  | -        |

|                     |                                |                                                                    |      |       |          |
|---------------------|--------------------------------|--------------------------------------------------------------------|------|-------|----------|
| E3CTK1 E3CTK1_SCHMD | Secreted peptide prohormone-9  | SLPYNPEYELY                                                        | 94.4 | 29.72 | -        |
| E3CTK1 E3CTK1_SCHMD | Secreted peptide prohormone-9  | LIDPLTFGSGFSNL                                                     | 99.9 | 90.13 | -        |
| E3CTK3 E3CTK3_SCHMD | Secreted peptide prohormone-10 | GAEFFLQRV-Ea                                                       | 71.1 | 31.36 | -        |
| E3CTI9 E3CTI9_SCHMD | Secreted peptide prohormone-11 | HQQLFPN                                                            | 65.3 | 20.02 | -        |
| E3CTI9 E3CTI9_SCHMD | Secreted peptide prohormone-11 | NDLLDSEFLNDMNENLE                                                  | 99.9 | 58.68 | -        |
| E3CTJ8 E3CTJ8_SCHMD | Secreted peptide prohormone-12 | pQ-QFFRNHRPEIENW                                                   | 1.5  | 15.72 | -        |
| E3CTJ8 E3CTJ8_SCHMD | Secreted peptide prohormone-12 | NY-Mo-DFFGLNGD-Mo-QR<br>F                                          | 99.9 | 52.92 | -        |
| E3CTJ8 E3CTJ8_SCHMD | Secreted peptide prohormone-12 | NY-Mo-DFFGLNGDMQR-Fa                                               | 19.5 | 22.56 | -        |
| E3CTJ8 E3CTJ8_SCHMD | Secreted peptide prohormone-12 | NYMDDFFGLNGDMQRF                                                   | 99.9 | 88.02 | -        |
| E3CTI8 E3CTI8_SCHMD | Secreted peptide prohormone-15 | pQ-SDRGYYPIFLD                                                     | 99   | 40.21 | -        |
| E3CTI8 E3CTI8_SCHMD | Secreted peptide prohormone-15 | YPQTYELNQSDRGYYPIFL<br>D                                           | 99.6 | 44.76 | -        |
| E3CTI8 E3CTI8_SCHMD | Secreted peptide prohormone-15 | FDPIQFG                                                            | 99.9 | 33.25 | -        |
| E3CTL7 E3CTL7_SCHMD | Secreted peptide prohormone-16 | pQ-FDPIMYGKLRQ                                                     | 44   | 24.77 | -        |
| E3CTL7 E3CTL7_SCHMD | Secreted peptide prohormone-16 | pQ-FDPIMY-Kac-RQ                                                   | 75.3 | 23.3  | -        |
| E3CTL7 E3CTL7_SCHMD | Secreted peptide prohormone-16 | pQ-SNPYFLSDIRSI                                                    | 98.5 | 36.57 | -        |
| E3CTL7 E3CTL7_SCHMD | Secreted peptide prohormone-16 | pQ-FDPIMY                                                          | 98.5 | 44.21 | -        |
| E3CTL7 E3CTL7_SCHMD | Secreted peptide prohormone-16 | QSNPYFLSDIRSI                                                      | 99.9 | 56.45 | -        |
| E3CTL7 E3CTL7_SCHMD | Secreted peptide prohormone-16 | pQ-FDPIMYGKLRQFY                                                   | 99.9 | 65.37 | -        |
| E3T7U5 E3T7U5_SCHMD | Secreted peptide prohormone 17 | IIDP-Mo-TYGTGFSNL                                                  | 99.9 | 55.84 | -        |
| E3T7U5 E3T7U5_SCHMD | Secreted peptide prohormone 17 | YIQDPDENDTLR                                                       | 81.1 | 29.66 | -        |
| E3T7U5 E3T7U5_SCHMD | Secreted peptide prohormone 17 | YIQDPDENDTLRDFYLQ                                                  | 91.1 | 27.51 | -        |
| E3T7U5 E3T7U5_SCHMD | Secreted peptide prohormone 17 | IIDPMTYGTGFSNL                                                     | 99.9 | 71.12 | -        |
| E3T7U6 E3T7U6_SCHMD | Secreted peptide prohormone 18 | GYHFFRL                                                            | 69.2 | 34.03 | -        |
| E3T7U8 E3T7U8_SCHMD | Secreted peptide prohormone 19 | KHIGHQIFRL                                                         | 78.8 | 31.9  | -        |
| D4P939 D4P939_SCHMD | Smed-NDK-3 (Fragment)          | DPASRVKHQVQYPCFVRE<br>QKEATFRMAKGLSVEFD                            | -    | -     | 1.13E-07 |
| H9XVZ7 H9XVZ7_SCHMD | SMG-1                          | QMINILELCICDSSSSDEFIV<br>LSGKLMMSLLHLNIRRGD<br>AAIVDFWCRIFDKMTNLQI | -    | -     | 2.66E-08 |

|                     |                                                |                                        |      |       |          |
|---------------------|------------------------------------------------|----------------------------------------|------|-------|----------|
| I1ZIE8 I1ZIE8_SCHMD | Uncharacterized protein (Fragment)             | DALHLAGGIVGGAANLAGGVVD                 | 57.4 | 23.81 | -        |
| I1ZIE8 I1ZIE8_SCHMD | Uncharacterized protein (Fragment)             | GAANLAGGVVDGAANLAGAAIDVVAGGPERDRHRSRND | 99.9 | 51.17 | -        |
| I1ZIE8 I1ZIE8_SCHMD | Uncharacterized protein (Fragment)             | LAGGIVGGAADLAGGVVDGAANLA               | 99.9 | 72.02 | -        |
| I1ZIE8 I1ZIE8_SCHMD | Uncharacterized protein (Fragment)             | WFVDDALH                               | 99.7 | 50.47 | -        |
| I1ZIE8 I1ZIE8_SCHMD | Uncharacterized protein (Fragment)             | WFVDDALHLAGGIVGGAA                     | 99.9 | 55.52 | -        |
| L0H970 L0H970_SCHMD | Utx (Fragment)                                 | SYLRTVLDEK                             | -    | -     | 3.40E-06 |
| I1ZID1 I1ZID1_SCHMD | Vault protein inter alpha trypsin-1 (Fragment) | EPLVTNIEEEFP-Ia                        | 66.1 | 23.08 | -        |
| L0H9P2 L0H9P2_SCHMD | Wdr82-2 (Fragment)                             | TPNSTSQPINCVAFNPKF                     | -    | -     | 2.53E-05 |
| V9XMQ5 V9XMQ5_SCHMD | X1.B2.2                                        | GAAWQDML-Wa                            | 95.6 | 35.11 | -        |
| V9XMT1 V9XMT1_SCHMD | X1.D.A1.2                                      | SEQADENQLIDNTG-Pa                      | 99.8 | 59.1  | -        |
| V9XMT1 V9XMT1_SCHMD | X1.D.A1.2                                      | SFDHEFLGGNLR                           | 98.5 | 36.85 | -        |
| V9XMT1 V9XMT1_SCHMD | X1.D.A1.2                                      | TASFDHEFLGGNLR                         | 99.2 | 37.82 | -        |
| V9XMT1 V9XMT1_SCHMD | X1.D.A1.2                                      | PLQNPSTTDQFWKDFELAYRRLKDHLEKKNA        | 99.8 | 46.81 | -        |
| V9XMT1 V9XMT1_SCHMD | X1.D.A1.2                                      | TASFDHEFLGGNLR                         | 99.9 | 67.87 | -        |

Putative PTMs include amidation (a), acetylation (ac), oxidation (O), pyroglutamination (p), and half of a disulfide bond (\*).

**Table S2. *De novo* peptide sequence tags from HPLC–ESI-(Q)TOF MS/MS and HPLC-ESI-FT-ICR MS/MS conducted on regenerating *S. mediterranea*.** Sequences are searched against the *S. mediterranea* transcriptome. Underlined residues are those with local confidence higher than 80%. Description includes BLAST matches, and whether or not a signal peptide is present in peptides without matches.

| Peptide                      | ALC (%) | FASTA Descriptor     | Description                                    |
|------------------------------|---------|----------------------|------------------------------------------------|
| <u>V</u> APEEHPVLLT          | 94      | dd_Smed_v4_246_0_5   | Actin                                          |
| acT-SEEEFQTMADQMKNLK         | 98      | dd_Smed_v4_160_0_1   | Acyl-CoA-binding protein (ACBP)                |
| <u>MLNELYDCENL</u> -Ma       | 85      | dd_Smed_v4_5383_0_1  | Cadherin repeats                               |
| <u>HSHHAAAYTLF</u>           | 86      | dd_Smed_v4_8673_0_1  | Calpain family cysteine protease               |
| acL-LADDV-Mo-TA              | 82      | dd_Smed_v4_4962_0_2  | Cell morphogenesis N-terminal                  |
| <u>TAFDKAGGANYGSAK</u>       | 93      | dd_Smed_v4_63_0_1    | Cofilin/tropomyosin-type actin-binding protein |
| <u>GYDFFRL</u>               | 94      | dd_Smed_v4_2463_0_1  | dDENN domain                                   |
| <u>DSLKMPEE</u>              | 90      | dd_Smed_v4_24408_0_4 | DNA helicase                                   |
| <u>HLVDETTLLK</u>            | 82      | dd_Smed_v4_6941_0_2  | Dynein heavy chain                             |
| acR-PLLRL                    | 88      | dd_Smed_v4_4747_0_1  | Elongation factor G, domain IV                 |
| <u>LWPSYW-Mo-PWESQ</u>       | 86      | dd_Smed_v4_7988_0_1  | F5/8 type C domain                             |
| <u>LPAVGIFCAGHIETE-Kac-V</u> | 85      | dd_Smed_v4_12290_0_1 | HCO3- transporter family                       |
| <u>MDFLNNRS-Mo-P-Sa</u>      | 86      | dd_Smed_v4_6361_0_1  | Histidine phosphatase superfamily              |
| <u>FEPMKLSDMLCPALP-Aa</u>    | 88      | dd_Smed_v4_16523_0_1 | Ion transport protein N-terminal               |
| <u>RPPGFSPFR</u>             | 95      | dd_Smed_v4_9725_0_1  | Ku70/Ku80 beta-barrel domain                   |
| <u>EDELDKVD</u>              | 89      | dd_Smed_v4_2472_0_1  | Membrane-bound O-acyltransferase family        |
| L-Mo-SDKDD-Mo-LN-Ra          | 85      | dd_Smed_v4_6344_0_1  | Myosin-binding striated muscle assembly        |
| <u>SVLDDLKDETYLS</u>         | 84      | dd_Smed_v4_6687_0_1  | Phosphotyrosine interaction domain             |
| <u>SNFDSFEAGYQ</u>           | 86      | dd_Smed_v4_6480_0_1  | Protein kinase domain                          |
| acM-EEPKHDSEHQVT             | 94      | dd_Smed_v4_13372_0_1 | Rhodopsin-like RPCR protein                    |
| <u>AVAGVTKDLLLLK</u>         | 95      | dd_Smed_v4_172_0_1   | Ribosomal protein L24e                         |



|                               |    |                      |                                                |
|-------------------------------|----|----------------------|------------------------------------------------|
| <u>o,acM-DTSDFKLF</u>         | 98 | dd_Smed_v4_295_0_1   | Ribosomal protein S7p/S5e                      |
| <u>acA-SFIAKQLVGKQLD</u>      | 91 | dd_Smed_v4_4479_1_1  | Synaphin                                       |
| <u>acH-HVDDALH</u>            | 88 | dd_Smed_v4_64731_0_1 | TCP-1/cpn60 chaperonin family                  |
| <u>EDEVKIDVNELGSFNKESLK</u>   | 98 | dd_Smed_v4_12_0_1    | Thymosin beta-4 family                         |
| <u>LPSQLDLEEEKNN</u>          | 98 | dd_Smed_v4_17_0_1    | Thymosin beta-4 family                         |
| <u>EEQTETNL-Ea</u>            | 99 | dd_Smed_v4_17_0_1    | Thymosin beta-4 family                         |
| <u>NFGSNVDDWRLYA</u>          | 95 | dd_Smed_v4_9302_0_1  | Transcription initiation factor TFIID          |
| <u>o,acM-IDEATKKTLAAILPLK</u> | 86 | dd_Smed_v4_4590_0_1  | Ubiquitin-fold modifier-conjugating enzyme 1   |
| <u>YSDDNLDLRFAWRL</u>         | 92 | dd_Smed_v4_2652_0_1  | Vacuolar protein sorting-associated protein 35 |
| <u>VNLENDLLRSLLD</u>          | 92 | dd_Smed_v4_8872_0_4  | Zinc finger domains                            |
| <u>DEFEMDDVIED</u>            | 85 | dd_Smed_v4_1066_0_1  | Has signal peptide                             |
| <u>YDIDQLNYGAGFTNV</u>        | 84 | dd_Smed_v4_11230_0_1 | Has signal peptide                             |
| <u>KTLFDKDDDEATLKELDNLEPK</u> | 98 | dd_Smed_v4_18_0_1    | Has signal peptide                             |
| <u>TVKDSPEFFLL</u>            | 89 | dd_Smed_v4_2014_0_1  | Has signal peptide                             |
| <u>YDTDHDVFRL</u>             | 97 | dd_Smed_v4_2574_0_1  | Has signal peptide                             |
| <u>WYPVKEYNNLVEL</u>          | 94 | dd_Smed_v4_2910_0_1  | Has signal peptide                             |
| <u>TYYLDAIDDGRL</u>           | 97 | dd_Smed_v4_3151_0_1  | Has signal peptide                             |
| <u>LLDPMTFGYGFSY-Sa</u>       | 90 | dd_Smed_v4_3845_0_1  | Has signal peptide                             |
| <u>LIDPLTFGSPESN-Na</u>       | 88 | dd_Smed_v4_3845_0_1  | Has signal peptide                             |
| <u>acG-YSGSDIIFPE</u>         | 87 | dd_Smed_v4_561_0_1   | Has signal peptide                             |
| <u>FANANDGVVPQT-Mo,a</u>      | 85 | dd_Smed_v4_6984_0_1  | Has signal peptide                             |
| <u>DMNDEFQFRDL</u>            | 92 | dd_Smed_v4_788_0_1   | Has signal peptide                             |
| <u>PTEPHYPQSGL-Kac</u>        | 88 | dd_Smed_v4_851_0_1   | Has signal peptide                             |
| <u>APEDQMFDT-Kac-NQ</u>       | 88 | dd_Smed_v4_918_0_1   | Has signal peptide                             |
| <u>ATWRDFFG</u>               | 84 | dd_Smed_v4_918_0_1   | Has signal peptide                             |
| <u>acA-Kac-IPFSWWHNL</u>      | 94 | dd_Smed_v4_9673_0_1  | Has signal peptide                             |
| <u>FDNNDHEYDSSLPKD</u>        | 83 | dd_Smed_v4_1117_0_1  | No signal peptide                              |
| <u>PVSMPFKWADYYKFQ</u>        | 96 | dd_Smed_v4_1178_0_1  | No signal peptide                              |

|                                     |    |                      |                   |
|-------------------------------------|----|----------------------|-------------------|
| <u>RGLPPT-Kac-LR-Fa</u>             | 92 | dd_Smed_v4_13322_0_1 | No signal peptide |
| <u>WLAKSGEHVMVFD</u>                | 87 | dd_Smed_v4_15396_0_1 | No signal peptide |
| <u>oM-NDDFFKNLRDE</u>               | 93 | dd_Smed_v4_2177_0_1  | No signal peptide |
| <u>KENPVVTGNNQLK</u>                | 90 | dd_Smed_v4_2246_0_1  | No signal peptide |
| <u>ATHSKT-C*-TAPLK</u>              | 85 | dd_Smed_v4_30210_0_1 | No signal peptide |
| <u>LSKDLYFNKYKI</u>                 | 98 | dd_Smed_v4_3306_0_1  | No signal peptide |
| <u>NSFSRNNL-Mo-DL</u>               | 98 | dd_Smed_v4_47572_0_1 | No signal peptide |
| <u>pQ-RLLPTQDQYETEPFLQVPLVKGRQE</u> | 87 | dd_Smed_v4_6313_0_4  | No signal peptide |
| <u>DRYVLHPFHL</u>                   | 85 | dd_Smed_v4_88260_0_1 | No signal peptide |

Putative PTMs include amidation (a), acetylation (ac), oxidation (O), pyroglutamination (p), and half of a disulfide bond (\*).
